1 **Electron microscopy characterization of minerals formed *in vitro* by**  
2 **human bone cells and vascular smooth muscle cells**

3

4 **Elena Tsolaki<sup>1</sup>, Louis Didierlaurent<sup>2</sup>, Eike Müller<sup>3</sup>, Markus Rottmar<sup>3</sup>, Najma Latif<sup>4</sup>,**  
5 **Adrian H. Chester<sup>4</sup>, Inge K. Herrmann<sup>2\*¶</sup>, Sergio Bertazzo<sup>1\*¶</sup>**

6

7 <sup>1</sup>Department of Medical Physics & Biomedical Engineering, University College London,  
8 London WC1E 6BT, UK

9 <sup>2</sup>Laboratory for Particles- Biology Interactions, Empa, Swiss Federal Laboratories for  
10 Materials Science and Technology, Lerchenfeldstrasse 5, CH-9014, St. Gallen, Switzerland.

11 <sup>3</sup>Laboratory for Biointerfaces, Empa, Swiss Federal Laboratories for Materials Science and  
12 Technology, Lerchenfeldstrasse 5, CH-9014, St. Gallen, Switzerland.

13 <sup>4</sup>Magdi Yacoub Institute, Imperial College London, Heart Science Centre, Harefield Hospital,  
14 Harefield, Middlesex UB9 6JH, UK,

15

16 \* Corresponding author

17 email: [s.bertazzo@ucl.ac.uk](mailto:s.bertazzo@ucl.ac.uk) (SB); [inge.herrmann@empa.ch](mailto:inge.herrmann@empa.ch) (IKH)

18

19 <sup>¶</sup>These authors contributed equally to this work.

20

21

22

## 23 **Abstract**

24 Soft tissue mineralization has been found to be a major component of diseases such as aortic  
25 valve stenosis and rheumatic heart disease. Cardiovascular mineralization has been suggested  
26 to follow mechanisms similar to those of bone formation with several cell culture models  
27 been developed over the years to provide mechanistic insights. These cell models have been  
28 characterized by a wide range of biochemical and molecular methods, which identified the  
29 presence of osteogenic markers and bone-like cells. However, there is a surprisingly small  
30 number of studies where the mineral formed in these cell culture models has been  
31 characterized by physico-chemical methods, and even fewer studies have compared this  
32 mineral to the one produced by bone cells in cultures. Here we investigated the morphology  
33 and composition of the minerals formed in cell cultures of vascular smooth muscle cells and  
34 bone cells. Electron microscopy and traditional cell mineralization assays were applied,  
35 revealing that vascular cells are indeed able to form calcified nodules of elemental  
36 composition similar to bone, however with different morphology. Comparison of  
37 morphologies of the two minerals to that found in cardiovascular tissue shows that some of  
38 tissue calcification resembles the calcified fibers produced by bone cells *in vitro*. These  
39 results suggest that the characterization of the mineral is of utmost importance and its  
40 morphology and chemical properties can contribute an important piece of information in the  
41 comprehensive analysis of soft tissue mineralization mechanisms, both in *in vitro* cell culture  
42 as well as in clinical samples.

43

## 44 **Introduction**

45 Healthy hard tissues, including bone and teeth, are naturally created in the body by  
46 mineralizing cells such as osteoblasts and odontoblasts. Mineralization of soft tissues has also  
47 been extensively described in the literature and generally, if not always, it has been attributed

48 to pathological processes in humans. Diseases associated with calcification of the vascular  
49 system are major contributors to patient morbidity and mortality worldwide [1]. Vascular  
50 calcification is a wide spread phenomenon, with a third of all Americans over the age of 45  
51 developing cardiovascular calcification complications [2, 3]. Mineral formation is a hallmark  
52 of major diseases including atherosclerosis [4] and coronary heart disease [5], for both of  
53 which there is currently no definitive treatment [5, 6]. Calcific cardiovascular diseases are  
54 estimated to lead to up to 23.3 million of deaths per year worldwide in 2030 [7].

55 Despite its clinical importance and major scientific efforts to understand it, the  
56 mechanisms that lead to formation of cardiovascular calcification are yet to be understood.  
57 Several studies suggest that cardiovascular calcification is an active process [8], even though  
58 for many years it was thought to be the direct result of degenerative processes [9]. Works in  
59 the literature that associate cardiovascular calcification formation with bone [10, 11] are  
60 mainly based on the identification of proteins such as osteonectin and Runx2 in calcific  
61 cardiac lesions [10, 12-16]. On the other hand, more recent research on cardiovascular  
62 calcification, showed that these calcifications are formed by three distinct forms of mineral;  
63 calcified particles, calcified fibers and a compact calcification [1], all of which have a  
64 structure significantly different from native bone [1, 17-19].

65 Cell cultures have been an integral part of cardiovascular research, since they provide  
66 a high degree of control of cell environment and allow the induction of calcification [20]. For  
67 example, it has been previously shown that the presence of calcium phosphate in cell cultures  
68 of mesenchymal stem cells promotes bone formation [21] and that calcification can be  
69 induced in vascular smooth muscle cells (VSMC) in the presence of inorganic phosphate [20,  
70 22-24]. Several works suggest that the capability of VSMC to produce calcification *in vitro*  
71 [25] is driven possibly by a transdifferentiation of VSMC to bone-like cells [11, 26, 27]. On the  
72 other hand, recent studies demonstrated that the formation of calcification in the vascular

73 tissue or from VSMC can be related to the release of extracellular vesicles [28-30], in a  
74 process different to the one observed in bone cells. In light of these seemingly conflicting  
75 results, it becomes clear that cardiovascular calcification is a much more complex  
76 phenomenon, possibly consisting of a mixture of osteogenic and non-osteogenic processes,  
77 and that our current assays and endpoints may not necessarily be sufficient to characterize  
78 calcifying cell cultures, as we have yet  
79 to understand their underlying mechanisms.

80 Here, we used physico-chemical methods to characterize the morphology and  
81 chemical composition of the minerals present in calcification produced by human bone cell  
82 (HBC) and human vascular smooth muscle cell (HVSMC) cultures. We then compared the  
83 morphology and composition of the minerals generated *in vitro* to minerals found in human  
84 bone and in calcified vascular tissue. Our results show clear structural differences between  
85 HBC and HVSMC mineralization, and similarities between the mineralized fibers formed in  
86 HBC cultures to mineralised fibers found sometimes in late stage cardiovascular disease.

87

## 88 **Materials and Methods**

89

### 90 **Cell culture experiments**

91 Human vascular smooth muscle cells (HVSMC) were acquired from ATCC®. For the  
92 different experiments (detailed below), the cells used were kept at -80°C and were used at  
93 passage four to eight. Cells were cultivated in vascular cell basal medium (ATCC®)  
94 complemented with vascular smooth muscle growth kit (ATCC®).

95 Bone marrow samples were harvested from patients undergoing surgical hip  
96 replacement (ethical approval was obtained from the local ethics committee; EKSG  
97 08/14). The detailed isolation procedure of the human bone cells (HBC) is described

98 elsewhere [31]. Human bone cells (HBC) were cultivated in a proliferation medium  
99 consisting in  $\alpha$ -MEM (Gibco®), 10% Fetal Calf Serum (FCS), 1% Penicillin-Streptomycin-  
100 Neomycin (PSN) and 1 ng/ml basic fibroblast growth factor (FGF-2). Human dermal  
101 fibroblast cells (HFC, primary cells, Sigma Aldrich, Buchs, Switzerland) were cultivated in  
102 DMEM supplemented with 15% FCS and 1% PSN/L-glutamine. During the cell culture  
103 experiments, Lactate Dehydrogenase (LDH) release was measured regularly (twice per week)  
104 using a CytoTox 96® Non-Radioactive Cytotoxicity Assay kit (Promega).

105 For experiments, cells were seeded on 24, 48 and 96 well-plates and grown to  
106 confluence. Cells were treated with different media for 28 days. Medium was exchanged  
107 every third day.

108 The following four media compositions were used: (i)  $\alpha$ -MEM ( *$\alpha$ -MEM*): containing  
109 only  $\alpha$ -MEM (ii) Proliferation medium (*Prolif*):  $\alpha$ -MEM, 10% FCS, 1% PSN and 1 ng/ml  
110 basic FGF-2. (iii) Differentiation medium (*Diff*):  $\alpha$ -MEM, 10% FCS, 1% PSN, 10 nM 1.25  
111 dihydroxy-vitamine D3 (VitD3), 50  $\mu$ M ascorbic acid phosphate, 2 mM  $\beta$ -glycerophosphate  
112 and 10 nM dexamethasone (Dex) (iv) Differentiation medium + Calcium (*DiffCa*):  $\alpha$ -MEM,  
113 15% FCS, 1% PSN, 6 mM calcium chloride , 10 mM sodium pyruvate, 10 $\mu$ M insulin,  
114 50 $\mu$ g/ml ascorbic acid, 10 mM  $\beta$ -glycerophosphate and 1 $\mu$ M Dex. To exclude any influence  
115 of compromised cell viability, lactate dehydrogenase content was monitored over the full  
116 duration of the experiments and cell viability was measured by MTS assay at day 28.

117

### 118 **Scanning Electron microscopy (SEM)**

119 For SEM imaging, samples were fixed in 4% (w/v) formaldehyde, dehydrated through  
120 a graded ethanol (Sigma, ACS reagent 99.5%) series (20, 30, 40, 50 70, 80, 90, 100 and  
121 100% (v/v)) and air dried. All samples were carbon coated and silver painted. A Hitachi S-  
122 3499N, a Carl Zeiss VP and a LEO Gemini 1525 FEGSEM were used for SEM analysis,

123 which involved imaging of the samples using secondary electron (SE) and backscattering  
124 electron (BSE) modes, for density-dependent colour SEM (DDC-SEM) to be acquired [1].  
125 Energy Dispersive X-ray Spectroscopy (EDS) analysis was also carried out using Oxford  
126 Instruments EDS detectors, integrated into the microscopes. For the analysis, accelerating  
127 voltages of 5 kV and 10 kV were used.

128

### 129 **Alizarin Red staining**

130 Following paraformaldehyde fixation, cells were stained with Alizarin Red S to reveal  
131 macroscopic calcifications. Alizarin Red S (2 g) was dissolved in 100 mL of distilled water  
132 and pH was adjusted to 4.2. Cells were stained with freshly prepared Alizarin Red solution  
133 for 2-3minutes.

134

### 135 **Calcium Assay**

136 After the samples were washed three times with PBS, cells were lysed in 1 M HCl for  
137 3 h at 37 °C under constant agitation. Calcium concentrations in the solutions were measured  
138 using a colorimetric QuantiChrom™ Calcium Assay Kit (BioAssay Systems) following the  
139 protocol provided by the manufacturer. In Brief, 5 µl of each lysate was transferred to a 96-  
140 well plate and 195 µl of working reagent (Quanti Chrom™ Calcium Assay DICA-500,  
141 Gentaur) were added. After 3 min of incubation, the absorbance of the obtained solution was  
142 measured at 595 nm (Biotek Instruments Elx 800, Witec AG). All samples were analysed in  
143 triplicates and calcium concentrations were calculated by means of a calibration curve using a  
144 calcium standard.

145

### 146 **Human sample procurement and preparation**

147 All samples were collected under the guidelines of ethical approval, which included  
148 informed consent that allowed us to anonymously analyse the tissues. Human femoral head  
149 bone samples were obtained by A. Hart from Charing Cross Hospital (London) from patients  
150 undergoing elective total hip arthroplasty procedures. Aortic valves from thirty-two patients  
151 were provided by the Oxford Heart Valve Bank at John Radcliffe Hospital (Oxford) and the  
152 Royal Brompton Hospital (London). These samples were obtained either after having been  
153 rejected for use as homografts or from patients undergoing aortic valve replacement surgery.

154 All samples were fixed using 4% (w/v) formaldehyde (Sigma, BioReagent,  $\geq 36.0\%$ )  
155 solution in phosphate buffered saline (PBS; Sigma) at room temperature immediately after  
156 collection, for at least one day.

157

## 158 **Results and Discussion**

159 We investigated the mineralization of HBC and HVSMC in different cell culture  
160 media. Pure  $\alpha$ -MEM ( $\alpha$ -MEM) and proliferation medium (*Prolif*) was used as base line  
161 (negative control). Mineralizing media used by representative literature studies were included  
162 in order to study *in vitro* mineralization with media containing 2 mM  $\beta$ -glycerophosphate  
163 (*Diff*) [31], and media supplemented with 6 mM  $\text{CaCl}_2$  and an additional 8 mM  $\beta$ -  
164 glycerophosphate (*DiffCa*) [32].

165 Total calcium concentration was measured in the cell cultures following 28 days of  
166 culturing with media changes every third day (Fig. 1). HBC accumulate significant amounts  
167 of calcium irrespective of the mineralizing medium (*Diff* and *DiffCa*), while HVSMC only  
168 show an increase in calcium concentration when exposed to calcium-supplemented  
169 mineralization medium (*DiffCa*). Interestingly, human fibroblast cells (HFC), which were  
170 included as non-vascular cells for reference, show similar calcium accumulation to the other  
171 cell cultures when exposed to *DiffCa* for 28 days.

172 **Fig 1. Total calcium content per well at day 28.** Cultures of human bone cells (HBC),  
173 human vascular smooth muscle cells (HVSMC) and human dermal fibroblasts (HFC), using  
174 different media.

175

176 Alizarin Red staining was performed, in order to visualize calcium accumulation in  
177 the cell cultures (Fig. 2). The results confirm mineral deposition in HBC cultures when  
178 exposed to *Diff* and *DiffCa*, and in HVSMC (and HFC, not shown) cultures, only when  
179 exposed to *DiffCa*.

180

181 **Fig 2. Alizarin Red stained cell cultures.** Calcium-rich regions appear in red. Magnification  
182 (40x).

183

184 Considering that Alizarin Red results may be misleading when applied to cell cultures  
185 and can stain positive even in the absence of mineral [33], we also performed high-resolution  
186 electron microscopy with elemental analysis. As expected, no evidence of calcium phosphate  
187 deposition was found in the HBC culture when exposed to  $\alpha$ -MEM and *Prolif* medium (Fig.  
188 3(a, b)). In agreement with the calcium assay and the Alizarin Red staining, HBC exposed to  
189 *Diff* and *DiffCa* presented significant amounts of mineral deposits. Scanning electron  
190 micrographs show fibre-like mineral deposits consisting of calcium phosphate (Fig. 3(c, d))  
191 in HBC incubated with *Diff* medium. Strikingly, the HBC exposed to *DiffCa* also present  
192 large amounts of calcium phosphate mineral deposits (Fig. 3 (e, f)), albeit with a completely  
193 different morphology to the mineral formed in the *Diff* medium. In the case of *DiffCa*, large  
194 chunks of mineral were detected with no evidence of fibrous structures, suggesting a rapid  
195 mineral precipitation. While nominal amount and the composition of mineral was very  
196 comparable in these two cell culture systems, the morphology of the mineral deposits is



197 strikingly different (see *Fig. 3(c, d)* vs. *(e, f)*).

198

199 **Fig 3. DDC-SEM micrographs of HBC (Human Bone Cells) calcification morphology**  
200 **produced in different media, imaged at low and high magnifications, with**  
201 **correspondent EDS spectra of indicated region. The organic material is represented as**  
202 **green while the inorganic material as orange.** (a, b) *Prolif* medium where no deposition of  
203 calcium phosphate is observed. (c, d) *Diff* medium where fibrous calcium phosphate  
204 structures are observed. (e, f) *DiffCa* medium where large deposition of calcium phosphate is  
205 observed. Scale bars = 20  $\mu\text{m}$ , 2  $\mu\text{m}$ .

206

207 For HVSMC, again, no evidence of calcium phosphate mineral deposition was found  
208 for cell cultures exposed to  $\alpha$ -MEM and *Prolif* medium (*Fig. 4 (a, b)*). In contrast to HBC,  
209 no evidence of calcium phosphate formation was found for HVSMC exposed to *Diff* (*Fig. 4*  
210 *(c, d)*). Calcium phosphate minerals were, however, observed in HVSMC cultures exposed to  
211 *DiffCa* (*Fig. 3 (e, f)*). Similar results were also observed in the HFC culture with  
212 mineralization only present in the *DiffCa* medium (results not shown). *DiffCa* medium is  
213 indeed saturated for hydroxyapatite [34], and thus it comes as no surprise that rapid mineral  
214 precipitation could form in an unstructured manner, similarly to the precipitate formed in the  
215 HBC. However the structures observed by the different cell cultures, are significantly  
216 different thus a cell involved rather than a simple supersaturation process might be taking  
217 place (see *Fig. 3 (e, f)* vs. *Fig. 4 (e, f)*).

218

219 **Fig 4. DDC-SEM micrographs of HVSMC (Human Vascular Smooth Muscle Cells)**  
220 **calcification morphology produced in different media, imaged at low and high**  
221 **magnifications, with correspondent EDS spectra of indicated region. The organic**

222 **material is represented as green while the inorganic material as orange.** (a, b) *Prolif*  
223 medium where no deposition of calcium phosphate is observed. (c, d) *Diff* medium where no  
224 deposition of calcium phosphate is observed. (e, f) *DiffCa* medium where calcium phosphate  
225 mineral is observed. Scale bars = 20  $\mu\text{m}$ , 10  $\mu\text{m}$ .

226

227 In order to compare the structure and morphology of the *in vitro* generated minerals to  
228 minerals found in clinical samples, we analysed a series of calcified human tissues. First, we  
229 imaged human bone samples by SEM. The characteristic calcified oriented and regular  
230 structure can be easily recognized on the micrographs (*Fig. 5 (a)*). On the other hand, at least  
231 three distinctly different characteristic structures, including fibers (*Fig. 5 (b)*), calcified  
232 particles (*Fig. 5 (c)*) and compact calcification (*Fig. 5 (d)*) could be identified in human  
233 cardiovascular tissues as previously described in the literature [1].

234

235 **Fig 5. DDC-SEM micrographs of the microstructure of human bone (a) and mineralised**  
236 **structures observed in cardiovascular tissue (b, c and d).** (a) High magnification image,  
237 showing calcified collagen fibers forming bone. Scale bar = 1  $\mu\text{m}$ . DDC-SEM micrographs of  
238 the calcified structures observed in human cardiovascular tissue (b) calcific fibres, (c) calcific  
239 particles (white arrow), (d) large compact calcification (white arrow) with calcific particles  
240 (red arrow). Scale bars = 1  $\mu\text{m}$ .

241

242 There is a notable similarity between minerals formed in the *in vitro* cultures of HBC  
243 in *Diff* media (*Fig. 2 (c, d)*) and the fibers that can be sometimes found at the later stages of  
244 calcification [1] present in the vascular tissue (*Fig. 5b and S1 Fig.*). From the similarities  
245 presented between the bone cell cultures calcific structures and the vascular structures, we  
246 could speculate that in some cases there is indeed some form of calcification present in the

247 cardiovascular tissue which is similar to the material produced by bone cells, supporting  
248 partially the many studies that report osteogenic differentiation of vascular cells. However, no  
249 similarities are observed with the natural bone structure, suggesting that the calcified fibers  
250 could be formed by a distinct mechanism to bone mineralization. Also, no morphological  
251 similarities were found for the mineral produced by HVSMC, neither to the mineral found in  
252 bone tissue nor in cardiac tissues, suggesting that our HVSMC model does not adequately  
253 depict the *in vivo* mineralization mechanism.

254         Taken together, these results show that the culturing of human bone cells is indeed  
255 able to form minerals similar to some of the structures found *in vivo*, and hence partially  
256 support the hypothesis that some sort of osteogenic differentiation in vascular tissue could  
257 happen sporadically. On the other hand, none of the cultures were able to produce any  
258 structure similar to the calcified particles that are widespread in vascular tissue [1, 17, 30]  
259 and are the first calcified structure that can be detected in those tissues [1] (*Fig. 5 (a)*). This  
260 study indicates that a major component of vascular calcification still cannot be described by  
261 the cell cultures tested here, and that there is likely an unaccounted player contributing to  
262 mineral deposition in the cardiovascular system.

263

## 264 **Acknowledgement**

265 I.K.H. and S.B. acknowledge support from the Swiss Heart Foundation and the Swiss  
266 National Science Foundation (grant no. 173077).

267

## 268 **References**

269 [1] Bertazzo S, Gentleman E, Cloyd KL, Chester AH, Yacoub MH, Stevens MM. Nano-analytical  
270 electron microscopy reveals fundamental insights into human cardiovascular tissue calcification.  
271 Nat Mater. 2013;12(6):576-83. doi: 10.1038/nmat3627.

- 272 [2] Jain T, Peshock R, McGuire DK, Willett D, Yu Z, Vega GL, et al. African Americans and Caucasians  
273 have a similar prevalence of coronary calcium in the Dallas Heart Study. *J Am Coll Cardiol.*  
274 2004;44(5):1011-7. doi: 10.1016/j.jacc.2004.05.0693.  
275
- 276 [3] Bild DE, Detrano R, Peterson D, Guerci A, Liu K, Shahar E, et al. Ethnic differences in coronary  
277 calcification: the Multi-Ethnic Study of Atherosclerosis (MESA). *Circulation.* 2005;111(10):1313-  
278 20. doi: 10.1161/01.CIR.0000157730.94423.4B.  
279
- 280 [4] Doherty TM, Asotra K, Fitzpatrick LA, Qiao J-H, Wilkin DJ, Detrano RC, et al. Calcification in  
281 atherosclerosis: Bone biology and chronic inflammation at the arterial crossroads. *Proc Natl*  
282 *Acad Sci U S A.* 2003;100(20):11201-6. doi: 10.1073/pnas.1932554100.  
283
- 284 [5] Liu W, Zhang Y, Yu CM, Ji QW, Cai M, Zhao YX, et al. Current understanding of coronary artery  
285 calcification. *J Geriatr Cardiol.* 2015;12(6):668-75. doi: 10.11909/j.issn.1671-5411.2015.06.012.  
286
- 287 [6] Wu M, Rementer C, Giachelli C. Vascular Calcification: An Update on Mechanisms and  
288 Challenges in Treatment. *Calcif Tissue Int.* 2013;93(4):365-73. doi: 10.1007/s00223-013-9712-z.  
289
- 290 [7] Mathers CD, Loncar D. Projections of global mortality and burden of disease from 2002 to 2030.  
291 *PLoS Med.* 2006;3(11):e442. doi: 10.1371/journal.pmed.0030442.  
292
- 293 [8] Karwowski W, Naumnik B, Szczepański M, Myśliwiec M. The mechanism of vascular calcification  
294 – a systematic review. *Med Sci Monit.* 2012;18(1):RA1-RA11. doi: 10.12659/msm.882181.  
295

- 296 [9] Proudfoot D, Skepper JN, Hegyi L, Bennett MR, Shanahan CM, Weissberg PL. Apoptosis Regulates  
297 Human Vascular Calcification In Vitro: Evidence for Initiation of Vascular Calcification by  
298 Apoptotic Bodies. *Circ Res.* 2000;87(11):1055-62. doi: 10.1161/01.res.87.11.1055.  
299
- 300 [10] Dhore CR, Cleutjens JPM, Lutgens E, Cleutjens KBJM, Geusens PPM, Kitslaar PJEHM, et al.  
301 Differential Expression of Bone Matrix Regulatory Proteins in Human Atherosclerotic Plaques.  
302 *Arteriosclerosis, Thrombosis, and Vascular Biology.* 2001;21(12):1998-2003. doi:  
303 10.1161/hq1201.100229.  
304
- 305 [11] Abedin M, Tintut Y, Demer LL. Vascular calcification: mechanisms and clinical ramifications.  
306 *Arterioscler Thromb Vasc Biol.* 2004;24(7):1161-70. doi: 10.1161/01.ATV.0000133194.94939.42.  
307
- 308 [12] Trion A, van der Laarse A. Vascular smooth muscle cells and calcification in atherosclerosis. *Am*  
309 *Heart J.* 2004;147(5):808-14. doi: 10.1016/j.ahj.2003.10.047.  
310
- 311 [13] Thompson B, Towler DA. Arterial calcification and bone physiology: role of the bone-vascular  
312 axis. *Nat Rev Endocrinol.* 2012;8(9):529-43. doi: 10.1038/nrendo.2012.36.  
313
- 314 [14] Bostrom K, Watson KE, Horn S, Wortham C, Herman IM, Demer LL. Bone morphogenetic protein  
315 expression in human atherosclerotic lesions. *J Clin Invest.* 1993;91(4):1800-9. Doi:  
316 10.1172/JCI116391  
317
- 318 [15] Shanahan CM, Cary NR, Metcalfe JC, Weissberg PL. High expression of genes for calcification-  
319 regulating proteins in human atherosclerotic plaques. *J Clin Invest.* 1994;93(6):2393-402. doi:  
320 10.1172/JCI117246.

321

322 [16]Fitzpatrick LA, Severson A, Edwards WD, Ingram RT. Diffuse calcification in human coronary  
323 arteries. Association of osteopontin with atherosclerosis. *J Clin Invest*. 1994;94(4):1597-604. doi:  
324 10.1172/JCI117501.

325

326 [17]Bertazzo S, Steele JAM, Chester AH, Yacoub MH, Stevens MM. Cardiovascular calcification violet  
327 pearl. *The Lancet*. 2014. doi:[https://doi.org/10.1016/S0140-6736\(13\)62369-7](https://doi.org/10.1016/S0140-6736(13)62369-7).

328

329 [18]Agarwal S, Bertazzo S. New paradigms in cardiovascular calcification. *Comptes Rendus Chimie*.  
330 2016;19(11):1605-9. doi: <https://doi.org/10.1016/j.crci.2015.09.013>.

331

332 [19]Bertazzo S, Gentleman E. Aortic valve calcification: a bone of contention. *Eur Heart J*.  
333 2017;38(16):1189-93. doi: 10.1093/eurheartj/ehw071.

334

335 [20]Akiyoshi T, Ota H, Iijima K, Son BK, Kahyo T, Setou M, et al. A novel organ culture model of aorta  
336 for vascular calcification. *Atherosclerosis*. 2016;244:51-8. doi:  
337 10.1016/j.atherosclerosis.2015.11.005.

338

339 [21]Castren E, Sillat T, Oja S, Noro A, Laitinen A, Konttinen YT, et al. Osteogenic differentiation of  
340 mesenchymal stromal cells in two-dimensional and three-dimensional cultures without animal  
341 serum. *Stem Cell Res Ther*. 2015;6:167. doi: 10.1186/s13287-015-0162-6.

342

- 343 [22]Rangrez AY, M'Baya-Moutoula E, Metzinger-Le Meuth V, Henaut L, Djelouat MS, Benchitrit J, et  
344 al. Inorganic phosphate accelerates the migration of vascular smooth muscle cells: evidence for  
345 the involvement of miR-223. *PLoS One*. 2012;7(10):e47807. doi: 10.1371/journal.pone.0047807.  
346
- 347 [23]Shin MY, Kwun IS. Phosphate-induced rat vascular smooth muscle cell calcification and the  
348 implication of zinc deficiency in a7r5 cell viability. *Prev Nutr Food Sci*. 2013;18(2):92-7. doi:  
349 10.3746/pnf.2013.18.2.092.  
350
- 351 [24]Lau WL, Pai A, Moe SM, Giachelli CM. Direct effects of phosphate on vascular cell function. *Adv*  
352 *Chronic Kidney Dis*. 2011;18(2):105-12. doi: 10.1053/j.ackd.2010.12.002.  
353
- 354 [25]Durham AL, Speer MY, Scatena M, Giachelli CM, Shanahan CM. Role of smooth muscle cells in  
355 vascular calcification: implications in atherosclerosis and arterial stiffness. *Cardiovasc Res*.  
356 2018;114(4):590-600. doi: 10.1093/cvr/cvy010.  
357
- 358 [26]Shanahan CM, Crouthamel MH, Kapustin A, Giachelli CM. Arterial Calcification in Chronic Kidney  
359 Disease: Key Roles for Calcium and Phosphate. *Circ Res*. 2011;109(6):697-711. doi:  
360 10.1161/circresaha.110.234914.  
361
- 362 [27]Latif N, Sarathchandra P, Chester AH, Yacoub MH. Expression of smooth muscle cell markers and  
363 co-activators in calcified aortic valves. *Eur Heart J*. 2015;36(21): 1335-45. doi:  
364 10.1093/eurheartj/ehf547  
365

- 366 [28]Koenen RR, Aikawa E. Editorial: Extracellular Vesicle-Mediated Processes in Cardiovascular  
367 Diseases. *Front Cardiovasc Med.* 2018;5:133. doi: 10.3389/fcvm.2018.00133.  
368
- 369 [29]Bakhshian Nik A, Hutcheson JD, Aikawa E. Extracellular Vesicles As Mediators of Cardiovascular  
370 Calcification. *Front Cardiovasc Med.* 2017;4:78. doi: 10.3389/fcvm.2017.00078.  
371
- 372 [30]Hutcheson JD, Goettsch C, Bertazzo S, Maldonado N, Ruiz JL, Goh W, et al. Genesis and growth  
373 of extracellular-vesicle-derived microcalcification in atherosclerotic plaques. *Nat Mat.*  
374 2016;15:335. doi: 10.1038/nmat4519.  
375
- 376 [31]Kopf BS, Schipanski A, Rottmar M, Berner S, Maniura-Weber K. Enhanced differentiation of  
377 human osteoblasts on Ti surfaces pre-treated with human whole blood. *Acta Biomat.*  
378 2015;19:180-90. doi: <https://doi.org/10.1016/j.actbio.2015.03.022>.  
379
- 380 [32]Trion A, van der Laarse A. Vascular smooth muscle cells and calcification in atherosclerosis. *Am*  
381 *Heart J.* 2004;147(5):808-14. doi: <https://doi.org/10.1016/j.ahj.2003.10.047>.  
382
- 383 [33]Cloyd KL, El-Hamamsy I, Boonrungsiman S, Hedegaard M, Gentleman E, Sarathchandra P, et al.  
384 Characterization of Porcine Aortic Valvular Interstitial Cell 'Calcified' Nodules. *PLoS One.*  
385 2012;7(10):e48154. doi: 10.1371/journal.pone.0048154.  
386
- 387 [34]Bertazzo, S, Zambuzzi, WF, Campos, DD, Ogeda, TL, Ferreira, CV, Bertran, CA., Hydroxyapatite  
388 surface solubility and effect on cell adhesion, *Colloids Surf B Biointerfaces.* 2010;78(2): 177-84,  
389 10.1016/j.colsurfb.2010.02.027



390

391

392 **Supporting Information**

393 **S1 Figure. BSE electron micrographs of calcification observed in human cardiovascular**  
394 **tissue and in the HBC culture exposed to Diff media.** a Low magnification of fibrous  
395 calcification observed in human cardiovascular tissue. b Low magnification of fibrous  
396 calcification produced in HBC culture exposed to Diff media. Scale bars = 10  $\mu\text{m}$ . c Higher  
397 magnification of calcification observed in human cardiovascular tissue where the calcified  
398 fibers along with collagen fibers can be observed. d Higher magnification of calcification  
399 produced in HBC culture exposed to Diff media. Scale bars = 1  $\mu\text{m}$ .

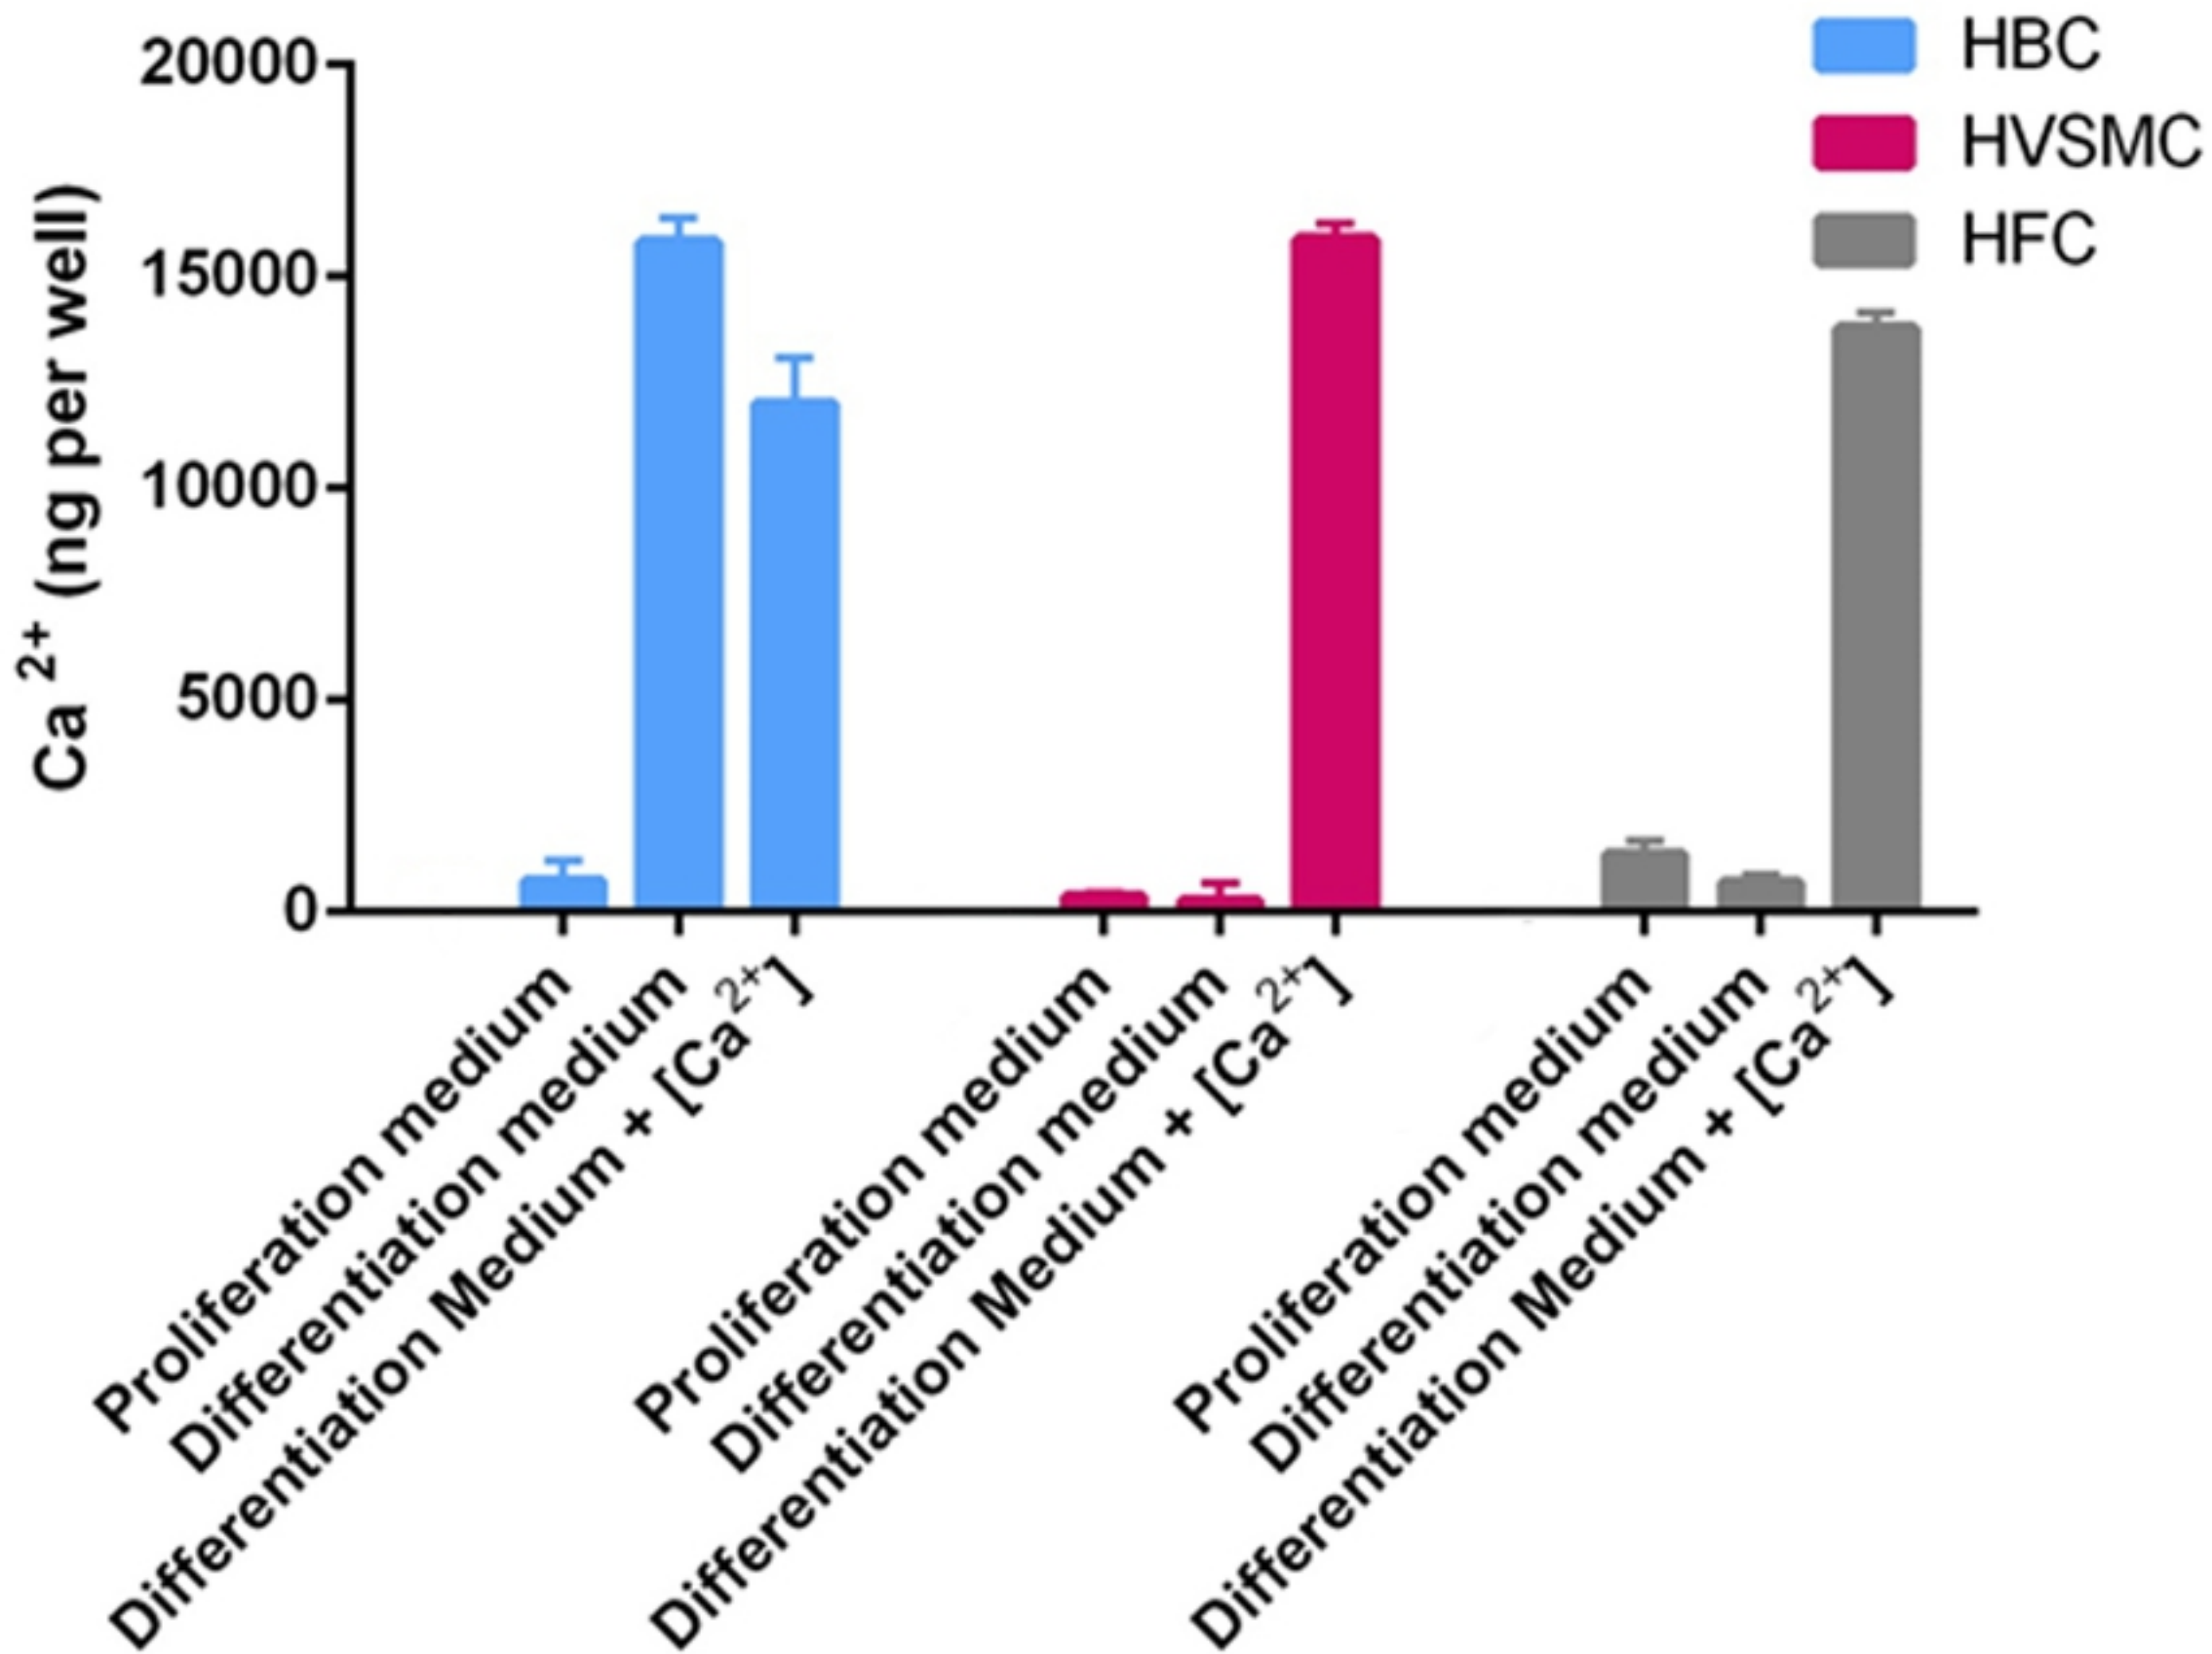

Figure

Prolif

Diff

DiffCa

HBC

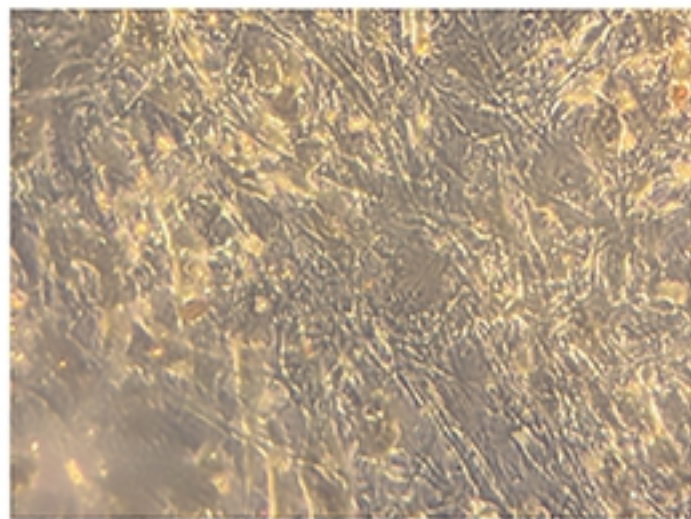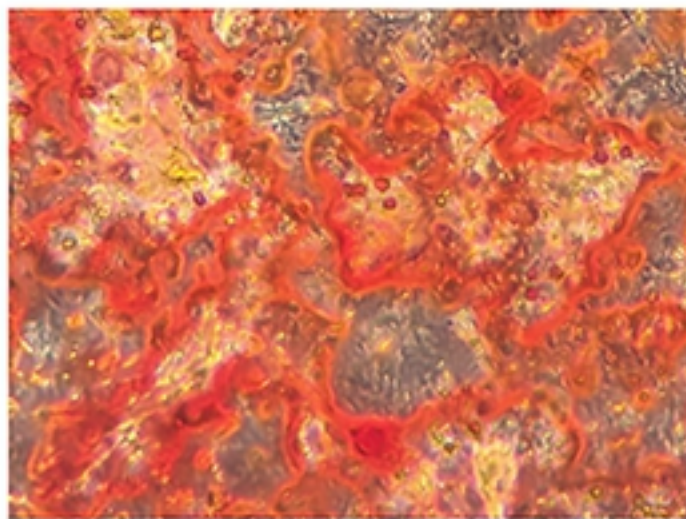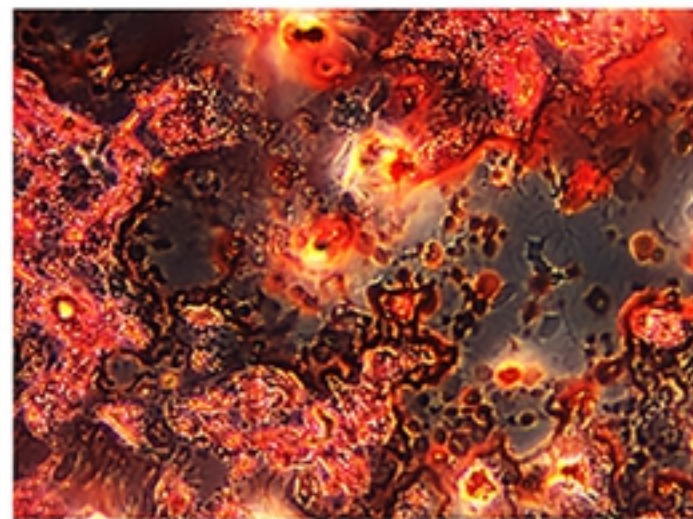

HVSMC

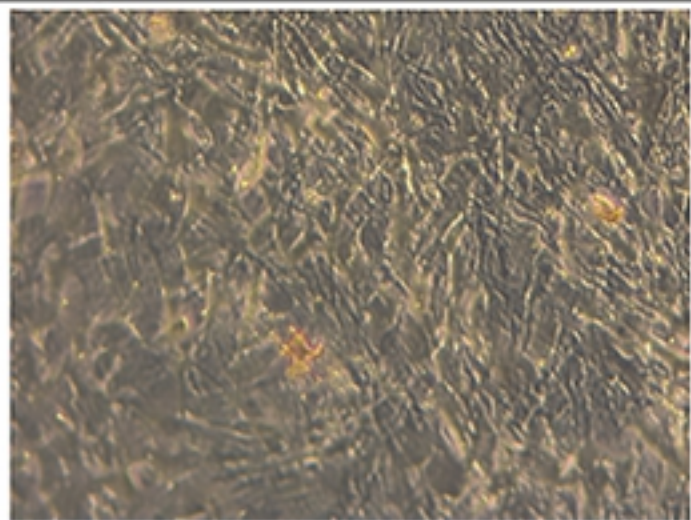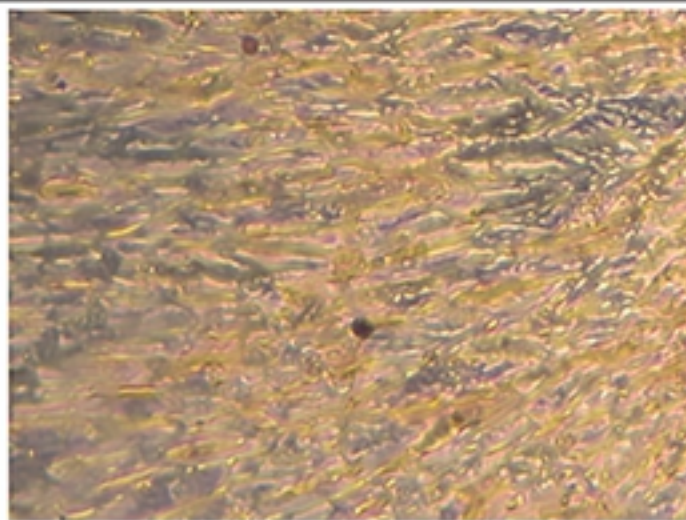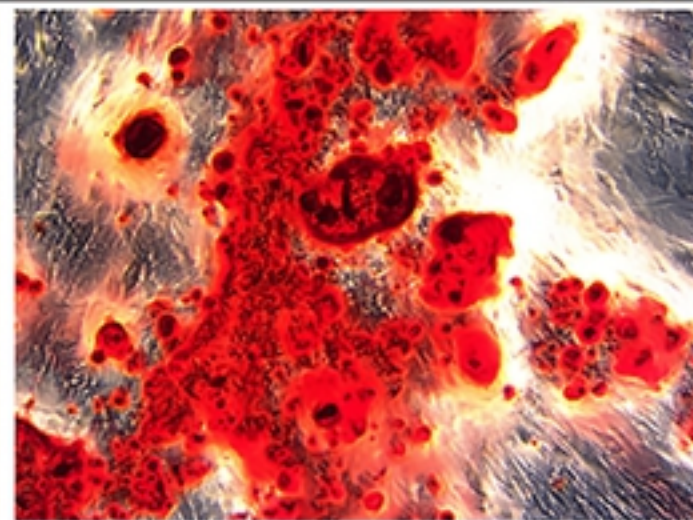

Figure

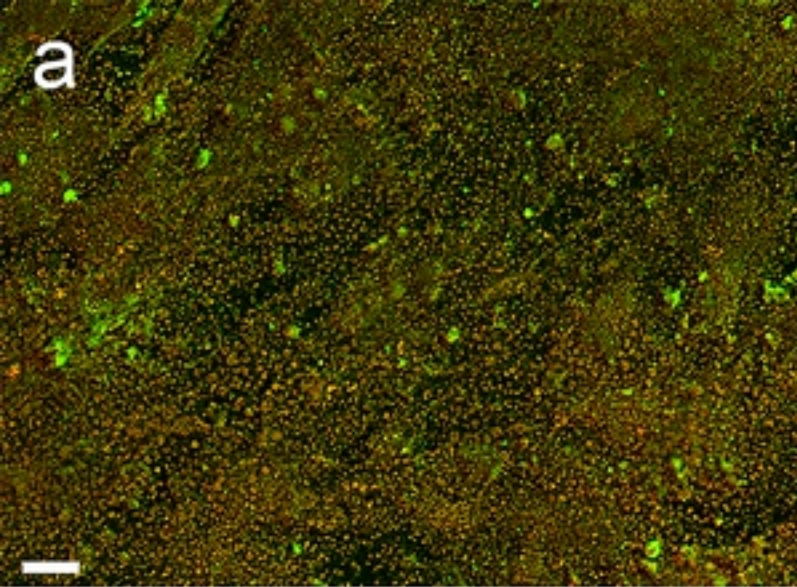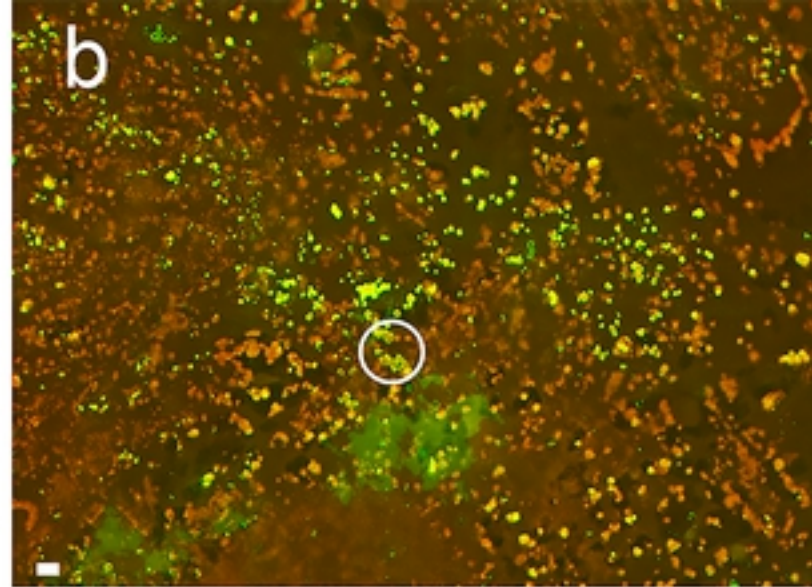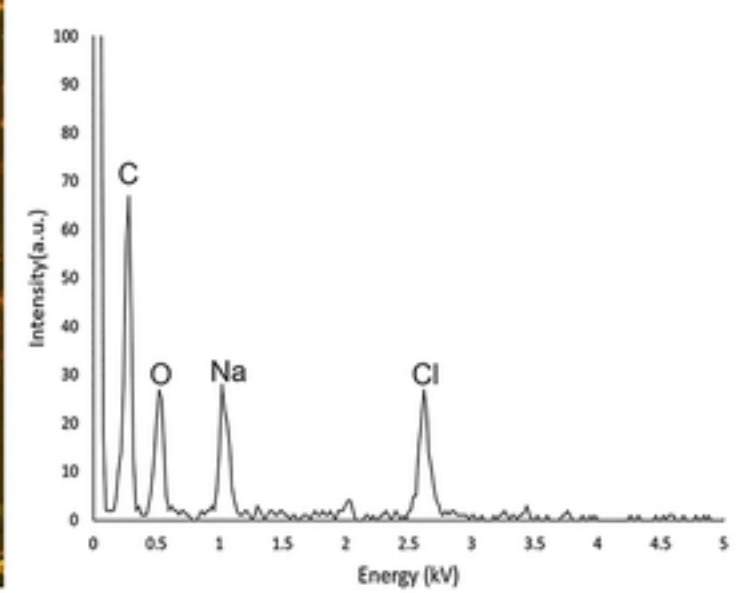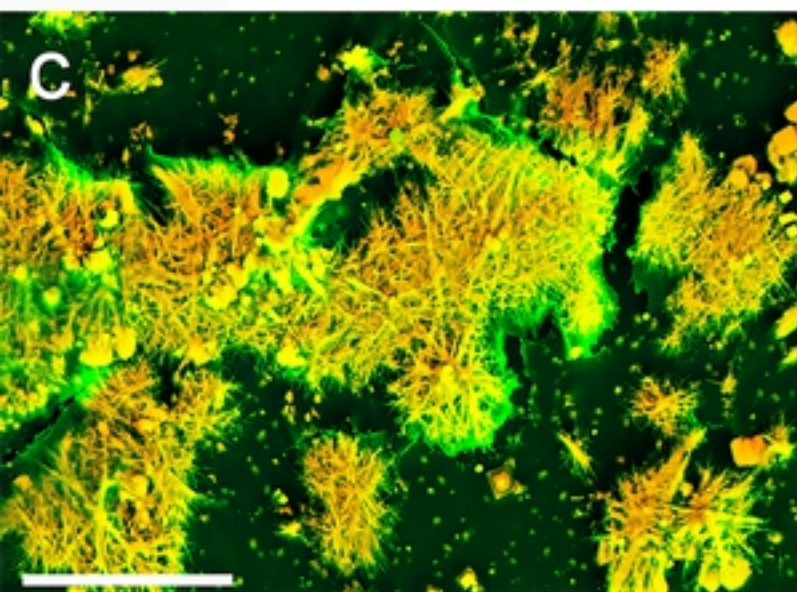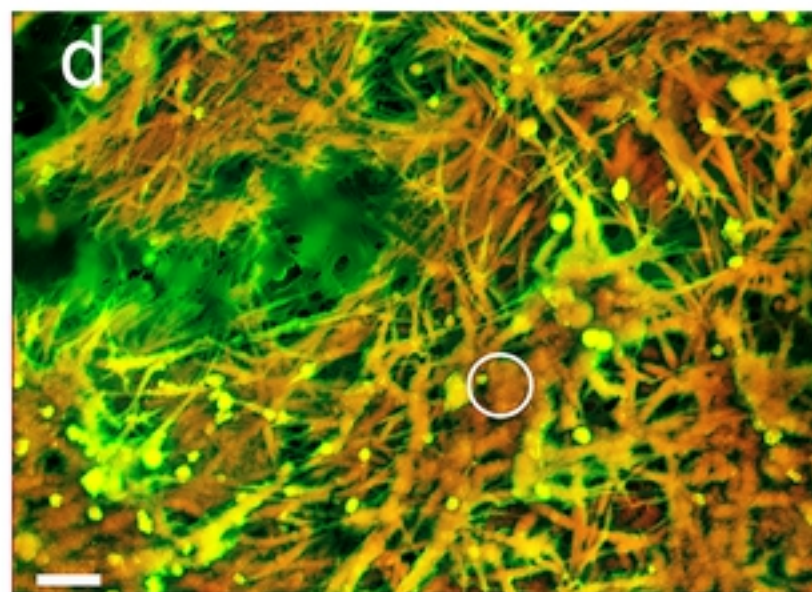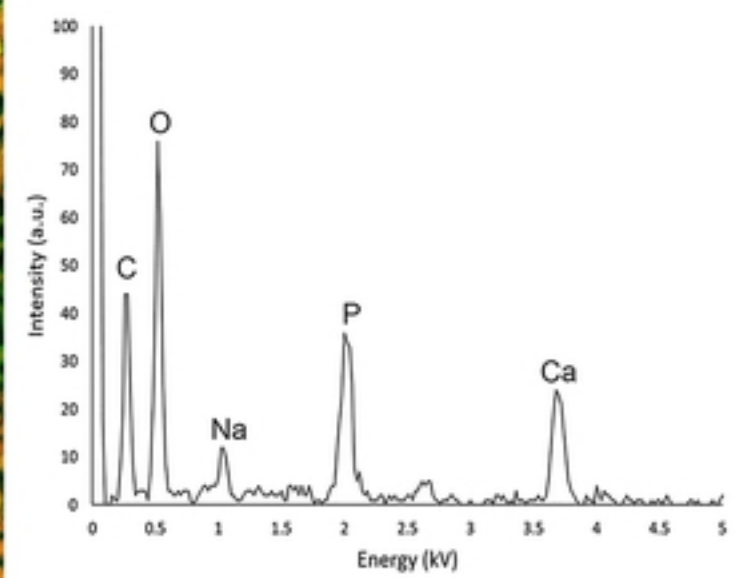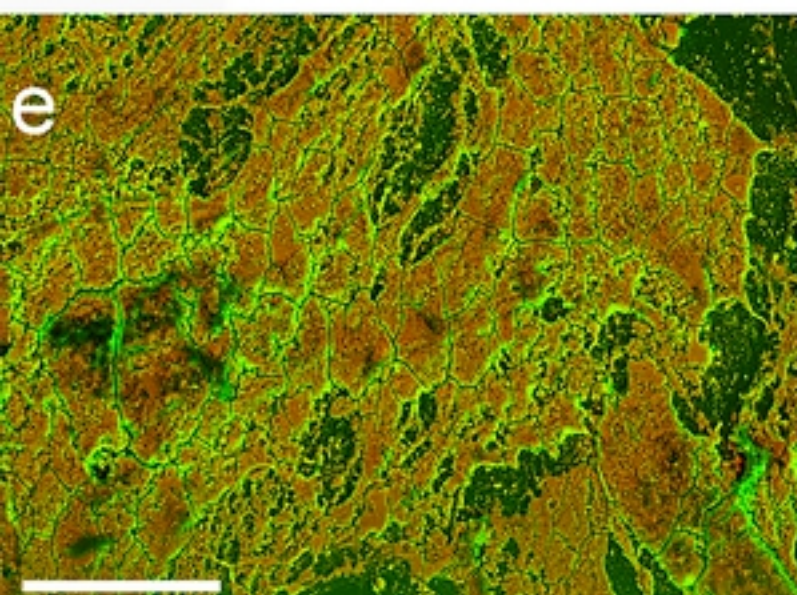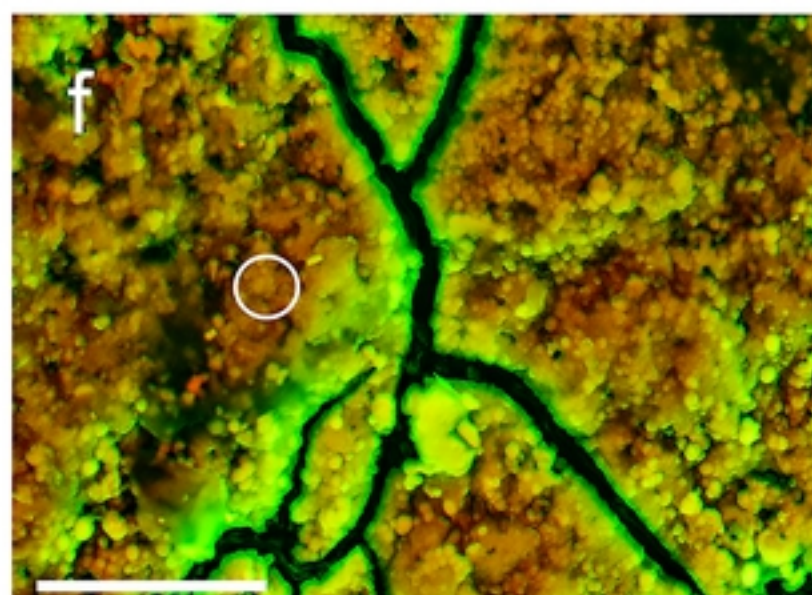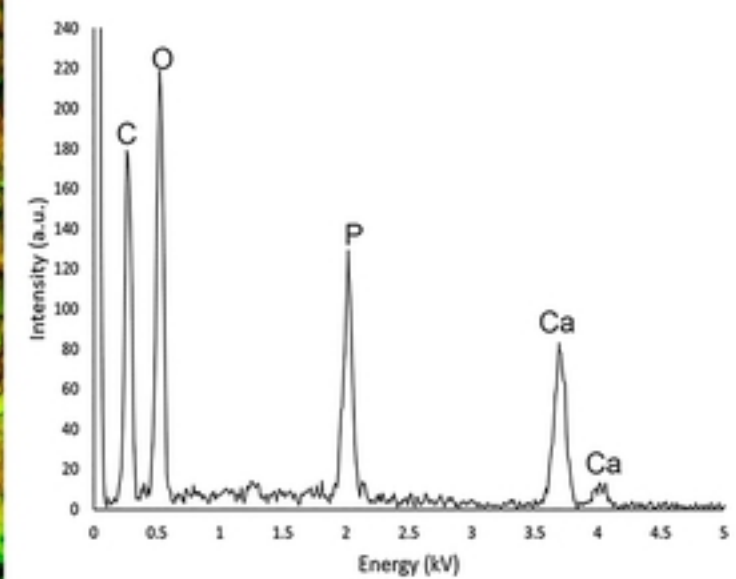

Figure

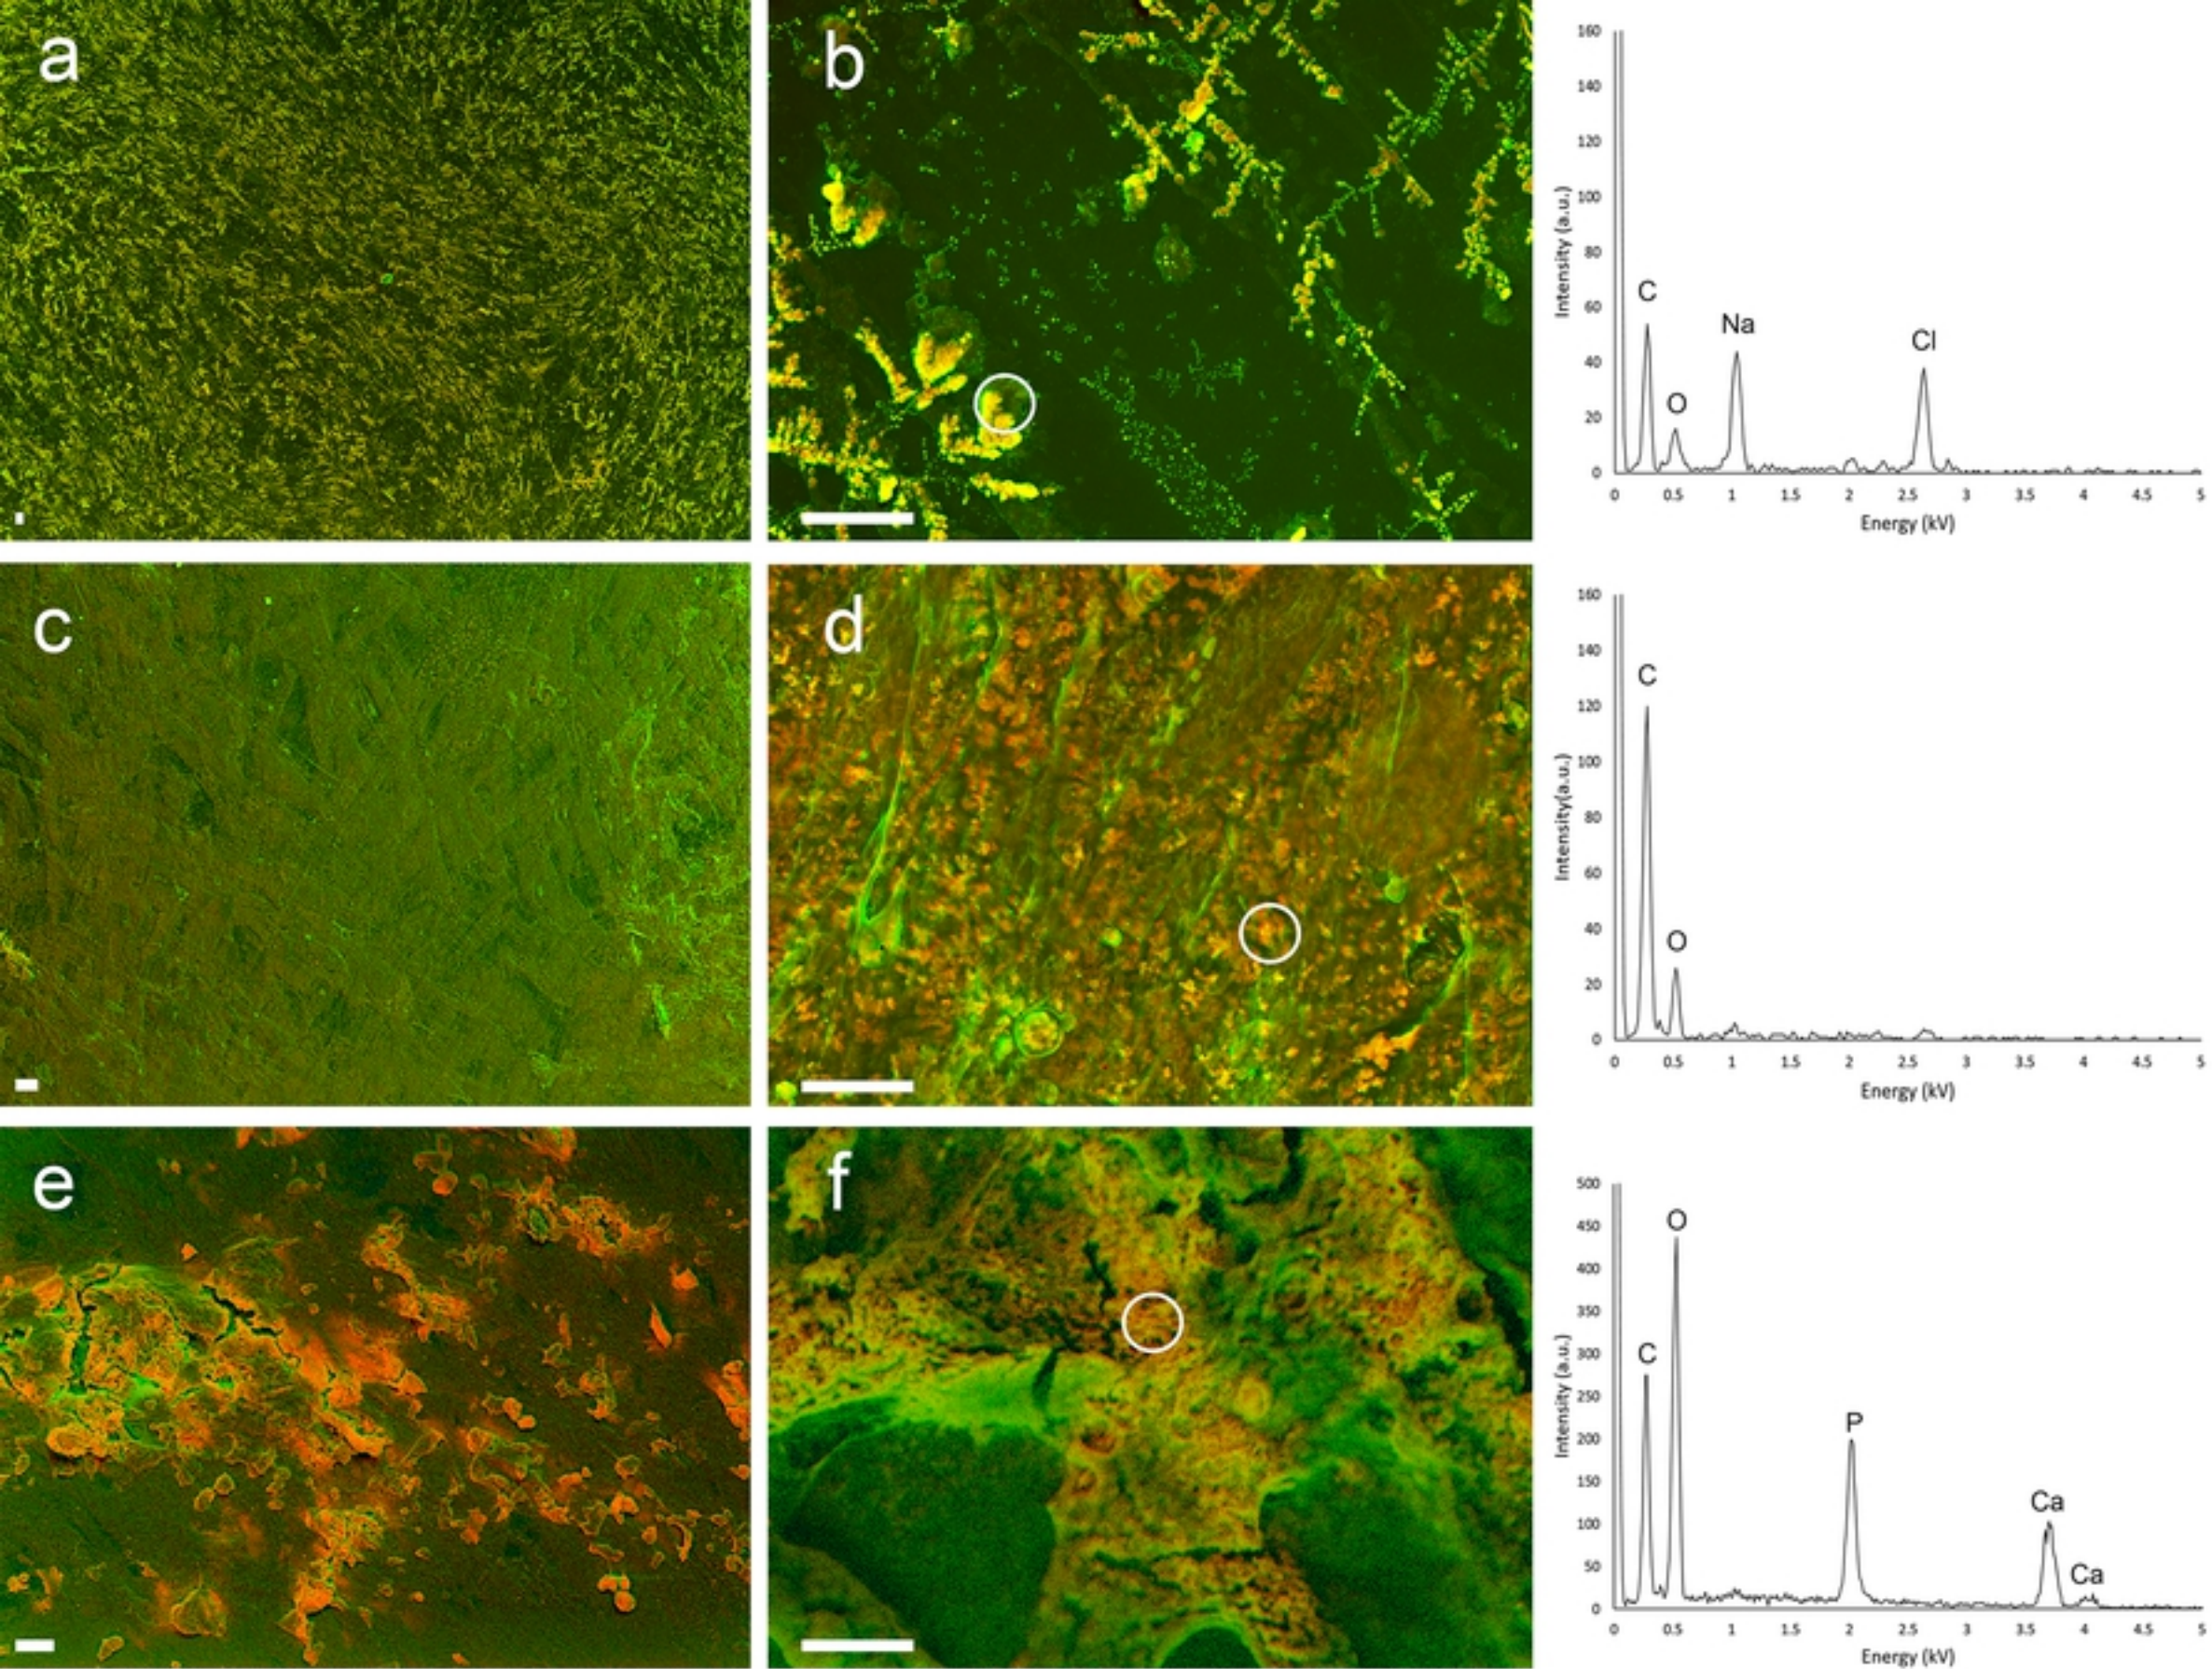

Figure

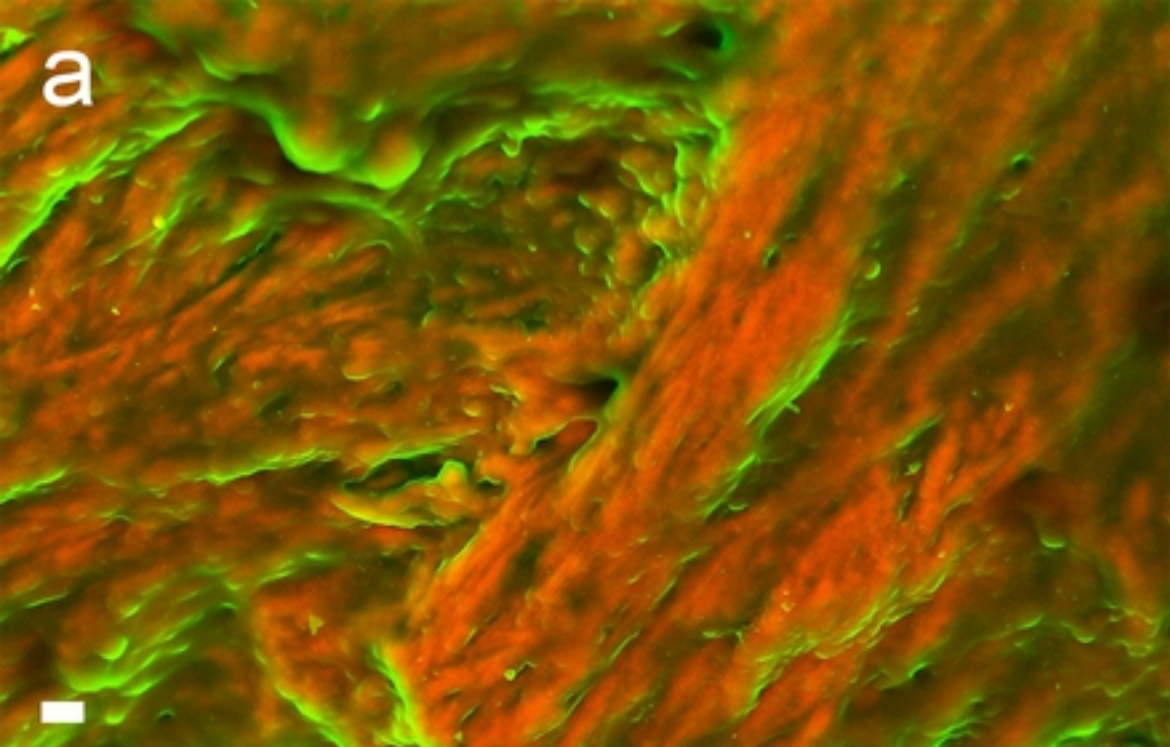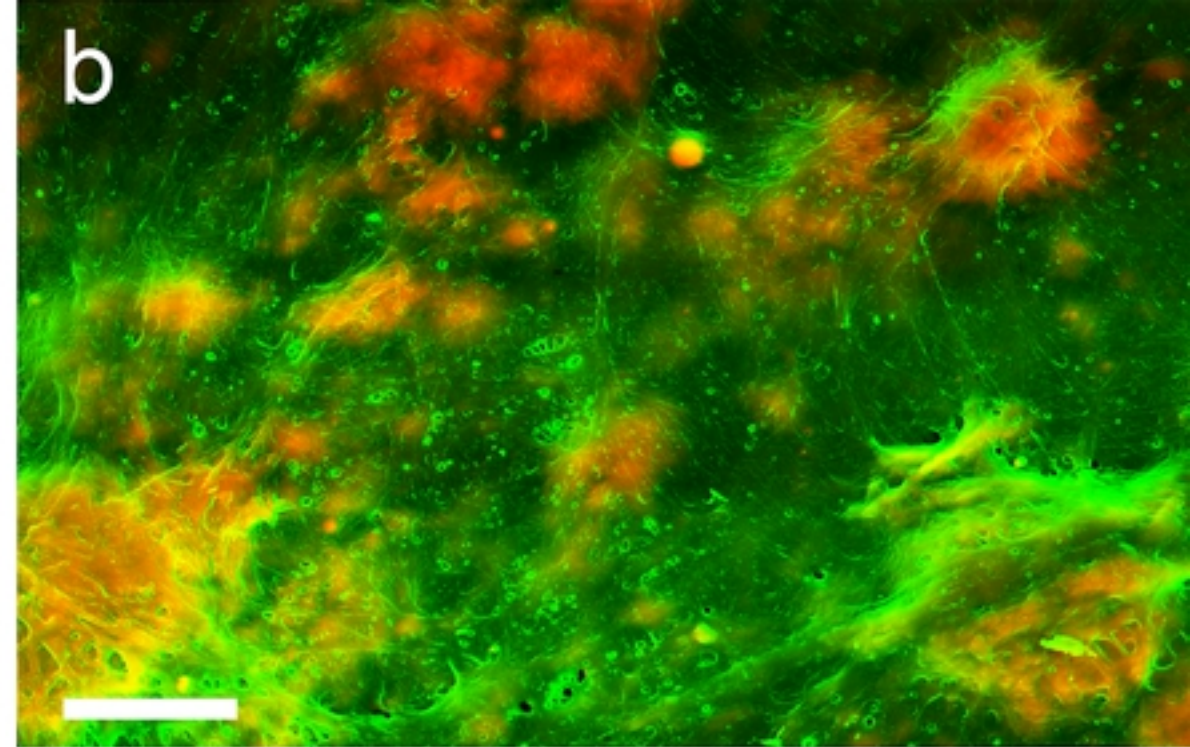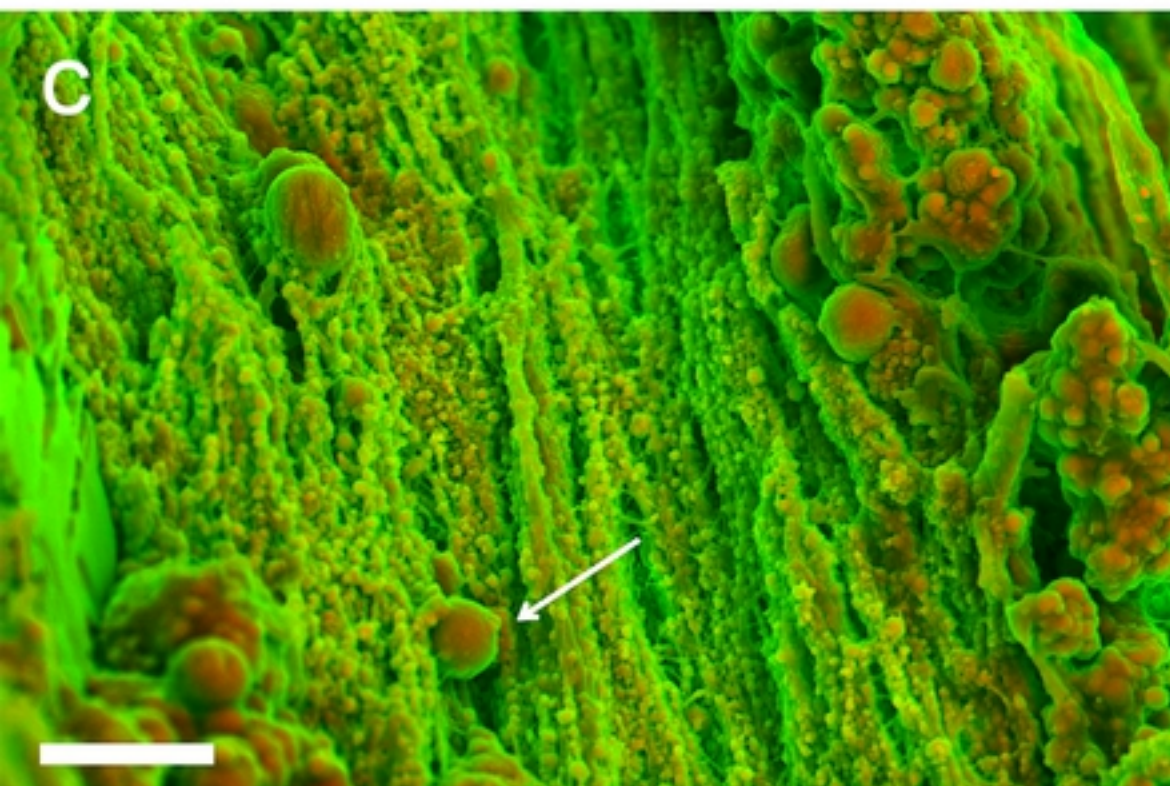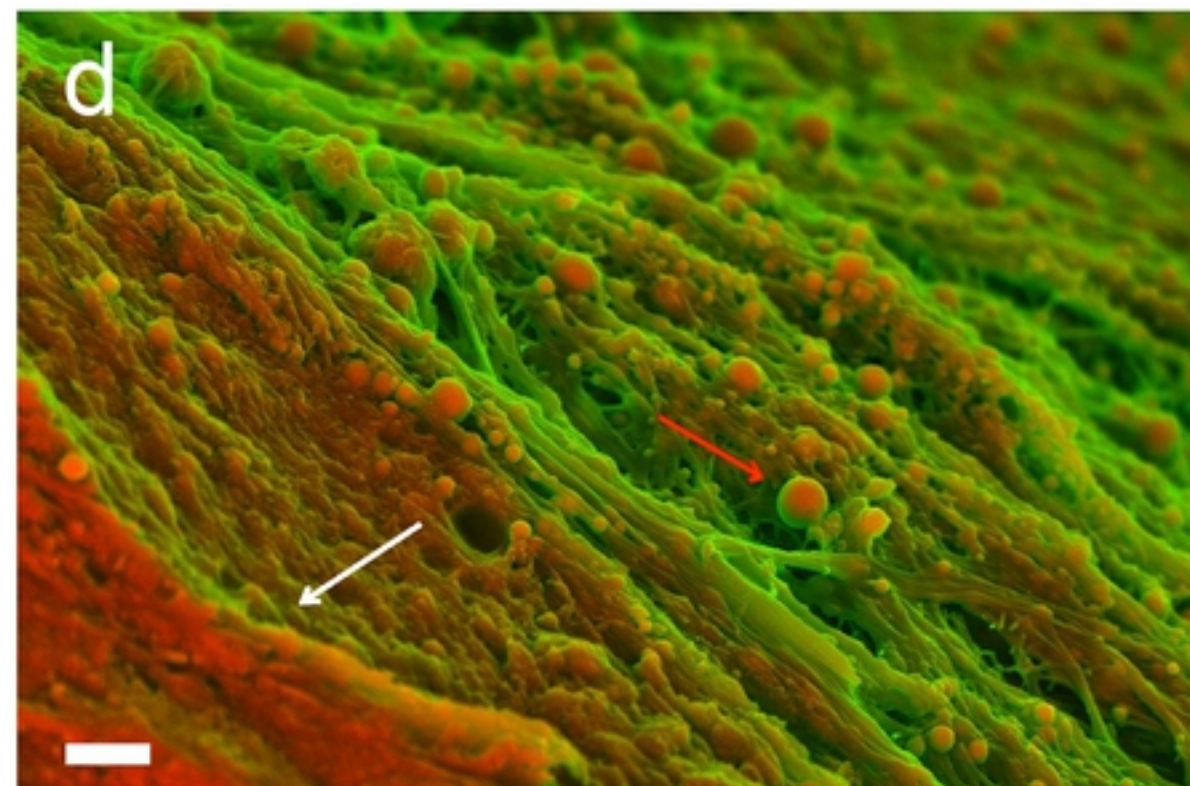

Figure
